# Supplementary material for: PsGSTF3, an Anthocyanin-Related Glutathione S-Transferase Gene, Is Essential for Petal Coloration in Tree Peony
Source: MDPI journal article supplement (doi:10.3390/ijms23031423), 2022-01-26
Supplement: s1 [file s1]

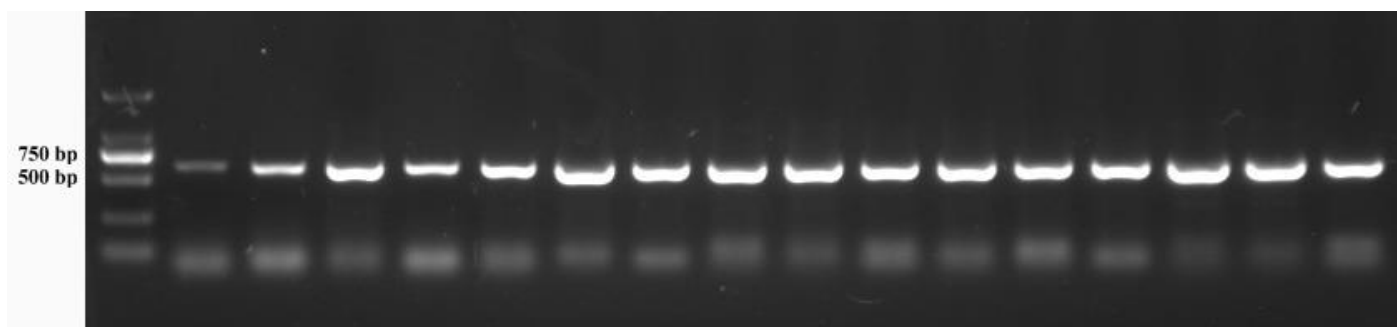

**Figure S1.** The electropherogram of positive PCR detection in 16 transgenic *Arabidopsis* lines.

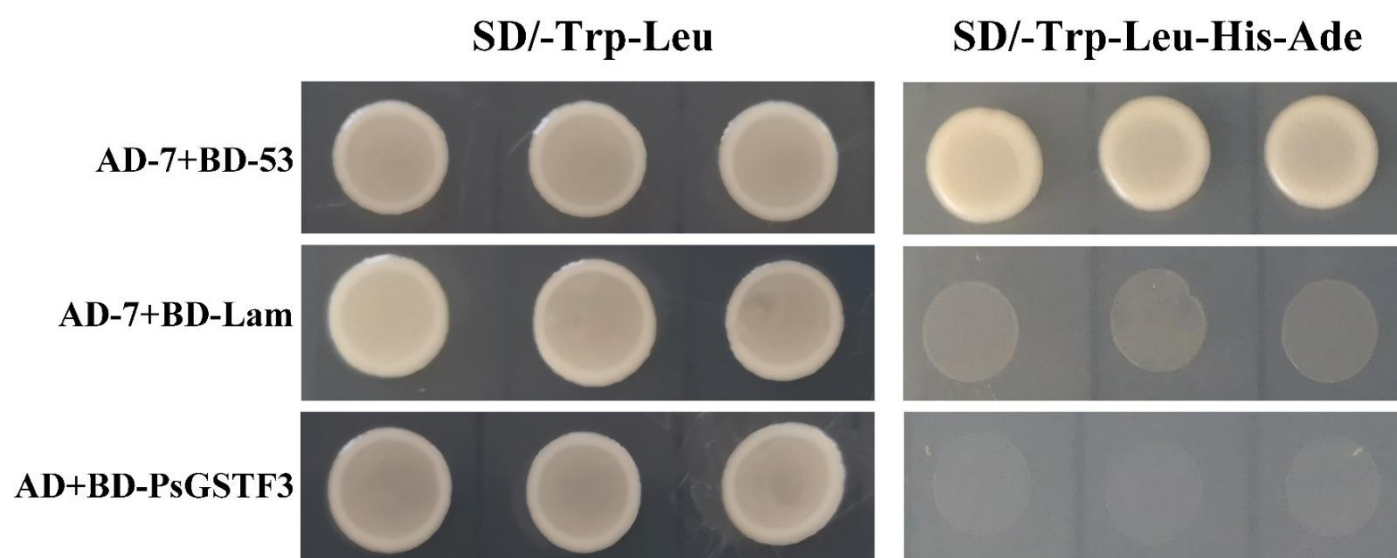

**Figure S2.** The autoactivation detection of PsGSTF3. The AD-T and BD-P53 was used as positive controls. The AD-T and BD-Lam was used as negative control.

**Table S1.** Summary of anthocyanin-related GSTs in different species

| Species                      | Genes           | Classes | Gene length(bp) | GenBank Accession No. | Aliases | Reference        |
|------------------------------|-----------------|---------|-----------------|-----------------------|---------|------------------|
| <i>Zea mays</i>              | <i>Bronze2</i>  | Tau     | 2948 (DNA)      | X81971.1              | -       | Marrs, 1995      |
| <i>Arabidopsis thaliana</i>  | <i>AtGSTF12</i> | Phi     | 1096 (mRNA)     | NM_121728.4           | AtTT19  | Kitamura, 2004   |
| <i>Petunia hybrida</i>       | <i>PhAN9</i>    | Phi     | 976 (mRNA)      | Y07721.1              | -       | Alfenito, 1998   |
| <i>Glycine max</i>           | <i>GmGST26A</i> | Tau     | 987 (mRNA)      | NM_001251510          | HSP26-A | Li, 1997         |
| <i>Perilla frutescens</i>    | <i>PfGST1</i>   | Phi     | 735 (mRNA)      | AB362191.1            | -       | Yamazaki, 2008   |
| <i>Senecio cruentus</i>      | <i>ScGST3</i>   | Phi     | 639 (mRNA)      | -                     | -       | Jin, 2013        |
| <i>Dianthus caryophyllu</i>  | <i>DcGSTF2</i>  | Phi     | 5590 (DNA)      | AB688111.1            | -       | Sasaki, 2012     |
| <i>Cyclamen persicum</i>     | <i>CkmGST3</i>  | Phi     | 642 (mRNA)      | AB682678.1            | -       | Kitamura, 2012   |
| <i>Ipomoea batatas</i>       | <i>IbGSTF4</i>  | Phi     | 651 (mRNA)      | MG873448              | -       | Kou, 2019        |
| <i>Litchi chinensiss</i>     | <i>LcGST4</i>   | Phi     | 645 (mRNA)      | KT946768.1            | -       | Hu, 2016         |
| <i>Malus domestica</i>       | <i>MdGSTF6</i>  | Phi     | 1136 (mRNA)     | AEN84869              | -       | Jiang, 2019      |
| <i>Prunus persica</i>        | <i>PpGST1</i>   | Phi     | -               | -                     | -       | Zhao, 2019       |
| <i>Vitis vinifera</i>        | <i>VviGST4</i>  | Phi     | 642 (mRNA)      | NM_001280940.1        | -       | Pérez-Díaz, 2016 |
| <i>Actinidia chinensis</i>   | <i>AcGST1</i>   | Phi     | 601 (mRNA)      | MK238757.1            | -       | Liu, 2019        |
|                              | <i>CsGSTa</i>   | Phi     | 642 (mRNA)      | MK431867.1            | -       |                  |
| <i>Camellia sinensis</i>     | <i>CsGSTb</i>   | Tau     | 660 (mRNA)      | MK431868.1            | -       | Liu, 2019        |
|                              | <i>CsGSTc</i>   | Tau     | 711 (mRNA)      | MK431869.1            | -       |                  |
| <i>Fragaria vesca</i>        | <i>FvRAP</i>    | Phi     | 759 (mRNA)      | -                     | -       | Luo, 2018        |
| <i>Lilium spp.</i>           | <i>LhGST</i>    | Phi     | 684 (mRNA)      | MK426728              | -       | Cao, 2020        |
| <i>Gossypium hirsutum</i>    | <i>GhGSTF12</i> | Phi     | -               | GH_D07G0816           | -       | Shao, 2021       |
| <i>Raphanus sativus</i>      | <i>RsGST1</i>   | Phi     | -               | RSG01330.t1           | -       | Lai, 2021        |
| <i>Euphorbia pulcherrima</i> | <i>Bract1</i>   | Phi     | 684 (mRNA)      | -                     | -       | Vilperte, 2021   |

**Table S2.** Sequences of PsGSTF3

>PsGSTF3 genomic DNA sequence

ATGGTAGTTAAGGTGTATGGCTCAGCTAAAGCGGCTTGTCCACAAAGAGTGATGGTTTGCCTTCTGGAAAAGGAGGTGGA  
ATTTGAAATTATACATGTTGATCTTGAATCTGGAGAGCACAAAAAGCCAGATTTCTTGCTCGGCAGGCTAGAAATTCAGGCTT  
GTACCCCATGAAAAATATGGCTTTCAAGTTTCTAACATGTAGTTGTTTCGTTTTCTTGAGCCGTTTGGGCAAGTTCCAGCC  
ATCGAGGATGGTGACTTGAAACTTTTTGGTAAGAGCATTGATTATATATAATGATATTTTGTGGATTCATTAAGATAAATAAT  
GGATTTCTGGTTTTGGTGCTTTCTAAAAGCAGAGTCTGTGTTATTGAGTTCACATAACATGTATCTATACAAAATGTAAAAAA  
TTCCACAGAAATCCAGGGCAATCATAAGATACTATGCAGCCAAGTTTGATAACCGCGGTTCAAACCTGTTGGGAACCACTT  
TGGAAGAGAGAGCTTTGATGGATCAATGGCTAGAAGTTGAAGCCCACAATTTCAATGATTTGGTTTACACTATTGTGCTTCA  
GATCGTAATTCTCCCCCGTATGGGACAAGGTACTGACTTGGCATTAGTCCGCACCTGTGAAGAAAAGCTTGAGAAAGTGCT  
TGATGTGTACGAGCAAAAGTTGTCAAAGAGCAGCTACCTGGCCGGAGACGATTTCACTCGCTGATCTCAGTCATCTTCC  
TGGTCTCAGATACCTCATAAATGAAGCTGGAAAAGGATACCTGGTGACCGTGAGGAAGAATGTGAATGCATGGTGGGAGA  
ATATATCAAATCGTCCTTCTTGAAGAAATTAATGAATCTTGTTAATTAA

Note: The sequence in the shade represents introns.

>PsGSTF3 cDNA sequence

ATGGTAGTTAAGGTGTATGGCTCAGCTAAAGCGGCTTGTCCACAAAGAGTGATGGTTTGCCTTCTGGAAAAGGAGGTGGA  
ATTTGAAATTATACATGTTGATCTTGAATCTGGAGAGCACAAAAAGCCAGATTTCTTGCTCGGCAGCCGTTTGGGCAAGTT  
CCAGCCATCGAGGATGGTGACTTGAACTTTTTGAATCCAGGGCAATCATAAGATACTATGCAGCCAAGTTTGATAACCGC  
GGTTCAAACCTGTTGGGAACCACTTTGGAAGAGAGAGCTTTGATGGATCAATGGCTAGAAGTTGAAGCCCACAATTTCAAT  
GATTTGGTTTACACTATTGTGCTTCAGATCGTAATTCTCCCCCGTATGGGACAAGGTACTGACTTGGCATTAGTCCGCACCT  
GTGAAGAAAAGCTTGAGAAAGTGCTTGATGTGTACGAGCAAAAGTTGTCAAAGAGCAGCTACCTGGCCGGAGACGATTT  
CACTCGCTGATCTCAGTCATCTTCTGGTCTCAGATACCTCATAAATGAAGCTGGAAAAGGATACCTGGTGACCGTGAGG  
AAGAATGTGAATGCATGGTGGGAGAATATATCAAATCGTCCTTCTTGAAGAAATTAATGAATCTTGTTAATTAA

>PsGSTF3 amino acid sequences

MVVKVYGSAAKACPQRVMVCLLEKEVEFEIHHVDLESGEHKKPDFLARQPFGQVPAIEDGDLKLFESRAIIRYYAAKFDNRRGSNLLG  
TTLEERALMDQWLEVEAHNFNDLVYTIVLQIVILPRMGQGTDLALVRTCEEKLEKVLVDVYEQRLSKSSYLAGDDFTLADLSHLPGLR  
YLINEAGKGYLVTRKNVNAWWENISNRPSWKKLMNLVN

**Table S3.** The anthocyanin-related GST amino acid sequences have been confirmed in other species

>MdGSTF6

MVVKVYGPVMAACPQRVMVCLLEKGVNFEIVDVLLEAGEHKRPEFLTRQPFQVVPVVEDGDFRLFESRAIRYYAAKYAGRGPNL  
LGTTLEEKAVVDQWLEVEGHNFNDLVYTLVLQLLVLP RMGQRGDAALINACEEKLEKVF DVYEERLSKSKYLAGETFTLADLSHLP  
GIRYLIDEAKLGHLVTGRKKVNAWWEDISNRPSWKKLMQLASDY

>FvRAP

MQFSSHEDEDEDEGNRLLNDFLCSDTTYRPFVLYSSQMVLKVYGPVRAACPQRVMVCLLELGVEFEIVPVDLQAGEQKQPHILA  
RQPFQVPAIEDGDFKLFESRAIVRYAAKYAERGPNNLLGTTLEEKALVDQWLEVESHNFNDLVFTTVLQLVILPSMGQPGDLALV  
RSCEEKLLKVF DVYEERLSKSTYLAGNYFSLADLSHLP AIRFLVDEFKMGHLITERKNVNAWWKDISNRPAWKKLMKLAQY

>VviGST4

MVMKVYGPVRAACPQRVLACLVEKGVFEVHVVDLDSGEQKRPDFLLRQPFQVVPVVEDGDFRLFESRAIVRYIAAKYAEQGPD  
LLGKSLEEKAVVDQWLEVEAHNFNELLVYTLVMQLVILPRMGERGDLAHTCEQKLEKVF DVYEQRLSKSR YLAGDSFTLADLSHL  
PAIRYLVKEAGMAHLVTERKSVSAWWEDISNRAAWKKVMELAA

>CkmGST3

MVVKVYGPATAGCPQRVIACLFELDVFELIHVDLESGEHKKPDLRQPFQVPAIEDGDFRLFESRAIMRYAAKYSEKNPDLQG  
STLEEKALVDQWLEVESHNFNDLVYTLVLHLMVFPQMGRSDMQLVQECESKLEKVF DIYEERLSKSNYLAGKFLTADLSHLP SIT  
FLMGEGLGHMVRNRKNVNSWWMDISSRPSWKKVRKLM D

>PhAN9

MVVKVHGSAMAACPQRVMVCLIELGVDFELIHVDLSLEQKKPEFLVLQPFQVVPVIEDGDFRLFESRAIRYYAAKYEVKGSKL TG  
TTLEEKALVDQWLEVESNNYNDLVYNMVLQLLVFPKMGQTSDTLVTKCAN KLENVFDIYEQRLSKSKYLAGEFFSLADLSHLP SL  
RFLMNEGGFSLVTKRKCLHEWYLDISSRDSWKKVLDLMMKKISEIEAVSIPAKEEAKV

>DcGSTF2

MGVIKVYGAKKAACPQRVIACLIELGIDYDVIFVDLES GHHKQPD FLALQPFQVVPVIEDGDFRLYESRAIRYLATKYSPKNSLNNN  
LLGTNVEEKAFVDQWLEVEAHNFNQVYNIVLELIVFPKMGKQTDISYVHSLEKKLANVLDVYEERLSKSKYLAGDFFTADLSHLP  
GLRYLTTEAKMPHLVEDLKCVNAWWTDISSRPAWKKVLSLDN

>AtGSTF12

MVVKLYGQVTAACPQRVLLCFLEKGIEFEI IHIDLDTFEQKKPEHLLRQPFQVPAIEDGDFKLFESRAIARYYATKFADQGTNLLGK  
SLEHRAIVDQWADVETYYFNVLAQPLVINLIKPRLGEKCDVVLVEDLKVKLGVLVDIYNNRNLSSNRFLAGEEFTMADLTHMPAMG  
YLMSITDINQMVKARGSFNRWWEEISDRPSWKKLMVLAGH

**Table S4.** Determination of anthocyanin content of tree peony between pTRV1/pTRV2-GFP and pTRV1/pTRV2-PsGSTF3-GFP treated groups via UPLC

| Compounds                                        | Class        | CK-1        | CK-2        | CK-3        | VIGS-1      | VIGS-2      | VIGS-3      |
|--------------------------------------------------|--------------|-------------|-------------|-------------|-------------|-------------|-------------|
| Cyanidin-3,5,3'-O-triglucoside                   | Cyanidin     | 0.116773638 | 0.097501934 | 0.097660182 | 0.091760746 | 0.086762049 | 0.068153955 |
| Cyanidin-3,5-O-diglucoside                       | Cyanidin     | 0.217203526 | 0.157175524 | 0.145562918 | 0.149296229 | 0.122106675 | 0.125556795 |
| Cyanidin-3-O-sophoroside                         | Cyanidin     | 0.8484375   | 0.699161067 | 0.697700101 | 0.439306569 | 0.518646905 | 0.444588235 |
| Cyanidin-3-O-(6-O-p-coumaroyl)-glucoside         | Cyanidin     | 0.182440104 | 0.118745266 | 0.097388045 | 0.094874493 | 0.099179875 | 0.088471197 |
| Cyanidin-3-O-galactoside                         | Cyanidin     | 3.79887821  | 3.50199552  | 3.69140831  | 2.17141119  | 2.23924178  | 1.94690669  |
| Cyanidin-3-O-rutinoside-5-O-glucoside            | Cyanidin     | 0.002803365 | 0.002959275 | 0.003392847 | 0.000591488 | 0.000275923 | 0.001738815 |
| Pelargonidin-3,5-O-diglucoside                   | Pelargonidin | 195.139623  | 187.028711  | 199.404458  | 76.8136659  | 70.8888889  | 84.5233266  |
| Pelargonidin-3-O-(6-O-p-coumaroyl)-glucoside     | Pelargonidin | 169.984776  | 159.087966  | 148.953394  | 139.847121  | 154.61706   | 150.920892  |
| Pelargonidin-3-O-glucoside                       | Pelargonidin | 4.28317308  | 5.9380167   | 5.41339412  | 0.350214923 | 0.309046179 | 0.649567951 |
| Pelargonidin-3-O-rutinoside                      | Pelargonidin | 0.047996595 | 0.028742008 | 0.031952381 | 0.024090835 | 0.033475499 | 0.01953355  |
| Pelargonidin-3-O-sophoroside                     | Pelargonidin | 1.08213942  | 0.995115048 | 1.03764134  | 0.761248986 | 0.761351079 | 0.694399594 |
| Pelargonidin-3-O-5-O-(6-O-coumaroyl)-diglucoside | Pelargonidin | 0.223229167 | 0.102395642 | 0.064240122 | 0.053168897 | 0.097231902 | 0.064039351 |
| Peonidin-3-O-(6-O-p-coumaroyl)-glucoside         | Peonidin     | 23.5651042  | 6.76489513  | 3.88348531  | 9.45995539  | 13.2415205  | 12.1854767  |
| Peonidin-3-O-glucoside                           | Peonidin     | 0.082252404 | 0.075719405 | 0.057574266 | 0.02121249  | 0.020908046 | 0.027973022 |
| Petunidin-3-O-glucoside                          | Petunidin    | 0.897740385 | 0.567774384 | 0.500285714 | 0.992230333 | 0.90374874  | 1.05972211  |
| Delphinidin-3-O-(6-O-malonyl-beta-D-glucoside)   | Delphinidin  | 0.011621555 | 0.011345775 | 0.010132422 | 0.018051237 | 0.01338534  | 0.015051724 |
| Delphinidin-3-O-galactoside                      | Delphinidin  | 0.017654868 | 0.009945551 | 0.014525775 | 0.003704542 | 0.006305283 | 0.006067546 |
| Delphinidin-3-O-glucoside                        | Delphinidin  | 0.062876002 | 0.034369375 | 0.02950922  | 0.068275345 | 0.043402299 | 0.070381947 |
| Malvidin-3,5-O-diglucoside                       | Malvidin     | 0.008886899 | 0.008653614 | 0.009422533 | 0.006950345 | 0.007437124 | 0.00737428  |

**Note:** CK: the petals injected with pTRV1/pTRV2-GFP; VIGS: the petals injected with pTRV1/pTRV2-PsGSTF3-GFP.

**Table S5.** Determination of anthocyanin content of tobacco between wild type and transgenic lines via UPLC

| Compounds                                            | Class        | WT-1          | WT-2          | WT-3          | OE-1          | OE-2         | OE-3         |
|------------------------------------------------------|--------------|---------------|---------------|---------------|---------------|--------------|--------------|
| Cyanidin-3-O-glucoside                               | Cyanidin     | 2.7043032     | 13.4946237    | 4.88285095    | 61.6345371    | 48.1622307   | 53.3467539   |
| Cyanidin-3-O-arabinoside                             | Cyanidin     | N/A           | N/A           | N/A           | 0.0496877545  | 0.0499366286 | 0.0445395068 |
| Cyanidin-3-O-xyloside                                | Cyanidin     | 0.00473746546 | 0.0284946237  | 0.00913565663 | 0.184632093   | 0.178200253  | 0.173628586  |
| Cyanidin-3-O-sambubioside                            | Cyanidin     | 0.0538886696  | 0.211290323   | 0.0765898799  | 0.985609557   | 1.00633714   | 0.968797182  |
| Cyanidin-3-O-rutinoside                              | Cyanidin     | 29.2143703    | 84.4086022    | 39.7716086    | 232.690741    | 233.460076   | 223.955712   |
| Cyanidin-3-O-(6-O-malonyl-beta-D-glucoside)          | Cyanidin     | 0.134622977   | 0.181989247   | 0.172081118   | 1.06434971    | 1.19391635   | 1.11977856   |
| Cyanidin-3-O-sophoroside                             | Cyanidin     | 0.0244769049  | 0.0491935484  | 0.0318960425  | 0.20961173    | 0.231178707  | 0.218419728  |
| Cyanidin-3-O-rutinoside-5-O-glucoside                | Cyanidin     | 0.66127122    | 2.08064516    | 0.990352432   | 8.82432799    | 13.0038023   | 11.172622    |
| Delphinidin                                          | Delphinidin  | N/A           | N/A           | N/A           | 0.0325821341  | 0.0306717364 | 0.033467539  |
| Delphinidin-3-O-sophoroside                          | Delphinidin  | 0.099684169   | 0.115322581   | 0.0968694625  | 0.15557969    | 0.202534854  | 0.134121792  |
| Delphinidin-3-O-rutinoside-5-O-glucoside             | Delphinidin  | 95.5388867    | 115.053763    | 103.169915    | 153.950584    | 166.539924   | 136.889784   |
| Delphinidin-3-O-rutinoside                           | Delphinidin  | 10.9553889    | 12.9301075    | 11.7542823    | 17.893022     | 18.9353612   | 17.4635128   |
| Delphinidin-3-O-galactoside                          | Delphinidin  | 0.116462692   | 0.149193548   | 0.130143729   | 0.269074124   | 0.30418251   | 0.301962758  |
| Delphinidin-3-O-arabinoside                          | Delphinidin  | 0.0491512041  | 0.0766129032  | 0.0376058279  | 0.0589193592  | 0.0798479087 | 0.0530951183 |
| Delphinidin-3-O-(6-O-malonyl)-glucoside-3'-glucoside | Delphinidin  | 0.186932491   | 0.271505376   | 0.171293562   | 0.404561499   | 0.474017744  | 0.480624056  |
| Delphinidin-3-O-(6-O-malonyl-beta-D-glucoside)       | Delphinidin  | 2.09238058    | 2.45430108    | 2.06733609    | 4.04561499    | 4.84157161   | 5.00754907   |
| Pelargonidin-3-O-rutinoside                          | Pelargonidin | 55.6652191    | 179.83871     | 75.0147667    | 795.547108    | 839.036755   | 757.423251   |
| Pelargonidin-3-O-glucoside                           | Pelargonidin | 0.256612712   | 1.05107527    | 0.360307147   | 5.67472169    | 5.22179975   | 4.68042275   |
| Pelargonidin-3-O-galactoside                         | Pelargonidin | 0.256612712   | 0.39516129    | 0.28548927    | 0.374694542   | 0.43599493   | 0.357322597  |
| Pelargonidin-3-O-arabinoside                         | Pelargonidin | 0.0519147256  | 0.0470430108  | 0.0470565072  | 0.112136845   | 0.180481622  | 0.137141419  |
| Pelargonidin-3-O-(6-O-malonyl-beta-D-glucoside)      | Pelargonidin | 0.144097908   | 0.663978495   | 0.2087025     | 4.61580234    | 4.7148289    | 4.20231505   |
| Pelargonidin                                         | Pelargonidin | N/A           | N/A           | N/A           | 0.169427097   | 0.178453739  | 0.150226472  |
| Pelargonidin-3,5-O-diglucoside                       | Pelargonidin | N/A           | N/A           | N/A           | 0.066793375   | 0.118631179  | 0.090840463  |
| Petunidin-3-O-(6-O-malonyl-beta-D-glucoside)         | Petunidin    | 2.68456376    | 2.68817204    | 2.63831463    | 3.58403475    | 4.43599493   | 4.65525918   |
| Petunidin-3-O-galactoside                            | Petunidin    | 0.183379392   | 0.0470430108  | 0.131521953   | 0.14580505    | 0.192141952  | 0.109964771  |
| Petunidin-3-O-rutinoside                             | Petunidin    | 0.523095144   | 0.61827957    | 0.488285095   | 0.597339126   | 0.709759189  | 0.699547056  |
| Petunidin-3-O-sambubioside-5-O-glucoside             | Petunidin    | N/A           | 0.0279569892  | 0.0192754479  | 0.0328536519  | 0.0261089987 | 0.0440362355 |
| Petunidin-3-O-glucoside                              | Petunidin    | 0.0238847217  | 0.00298387097 | 0.0271707029  | 0.00204724409 | 0.0160963245 | 0.0161550075 |
| Peonidin-3-O-rutinoside                              | Peonidin     | 2.28977497    | 7.66129032    | 3.26835991    | 37.740972     | 48.9226869   | 40.2617011   |
| Peonidin-3-O-(6-O-malonyl-beta-D-glucoside)          | Peonidin     | 0.0396762732  | 0.0704301075  | 0.0374089388  | 0.227260386   | 0.191381496  | 0.224710619  |
| Peonidin-3-O-glucoside                               | Peonidin     | N/A           | N/A           | N/A           | 0.0464295411  | 0.0400506971 | 0.0415198792 |
| Peonidin                                             | Peonidin     | 0.0949467035  | 0.0825268817  | 0.10218547    | 0.235948955   | 0.306717364  | 0.235279316  |
| Malvidin-3-O-(6-O-p-coumaroyl)-glucoside             | Malvidin     | 0.104026846   | 0.0994623656  | 0.112817484   | 0.127341841   | 0.163498099  | 0.157523905  |
| Malvidin-3-O-arabinoside                             | Malvidin     | 0.0546782471  | 0.086827957   | 0.0470565072  | 0.120282378   | 0.11026616   | 0.0903371917 |

**Note:** WT: the petals of wild type; OE: the petals of transgenic lines.

**Table S6.** Primer information used for full-length amplification of *PsGSTF3*

| Primer name | Nucleotide sequence        | Purpose                            |
|-------------|----------------------------|------------------------------------|
| Q-PsGSTF3-F | ATGGTAGTTAAGGTGTATGG       | Full-length amplification          |
| Q-PsGSTF3-R | TTAATTAACAAGATTCATTAATTTTC |                                    |
| M13-47      | CGCCAGGGTTTTCCCAGTCACGAC   | Universal primer of pMD19-T vector |
| RV-M        | GAGCGGATAACAATTTACACACAGG  |                                    |

**Table S7.** Primer information used for vector construction

| Primer name     | Nucleotide sequence                                  | Purpose                         |
|-----------------|------------------------------------------------------|---------------------------------|
| PsGSTF3-PHB-F   | ACCAGTCTCTCTCTC <u>AAGCTT</u> ATGGTAGTTAAGGTG        | for heterologous overexpression |
| PsGSTF3-PHB-R   | GATACGAACGAAAGCTCTAGATTAATTAACAAGATT                 |                                 |
| PsGSTF3-PHG-F   | TCTCTCTCAAGCTT <u>GGATCC</u> ATGGTAGTTAAGGTGTATGGCTC | for Subcellular localization    |
| PsGSTF3-PHG-R   | CGGGTCATGAGCTC <u>TGCAG</u> ATTAACAAGATTCATTAATTTTC  |                                 |
| PsGSTF3-pTRV2-F | GTGAGTAAGGTTACCGA <u>ATTC</u> ACCTGTTGGGAACCACTTTG   | for VIGS                        |
| PsGSTF3-pTRV2-R | CGTGAGCTCGGTACCGGATCC <u>TCT</u> GAGACCAGGAAGATGACT  |                                 |
| BD-PsGSTF3-F    | AGGCCGAATTCGGGGGATCCATGGTAGTTAAGGTGTATGGC            |                                 |
| BD-PsGSTF3-R    | CTAGTTATGCGGCCGCTGCAGTTAATTAACAAGATTCATTAA           |                                 |
| AD-PsMATE-F     | GTGGGCATCGATACGGGATCCATGGGTTCCGTACGGTACCA            |                                 |
| AD-PsMATE-R     | ATTCATCTGCAGCTCGAGCTCTTATATGTTGTCCACAAACAAGGCC       |                                 |
| AD-PsANS-F      | GCCATGGAGGCCAGTGAATTCATGGTGAATTCAGTAGCTCC            |                                 |
| AD-PsANS-R      | ATTCATCTGCAGCTCGAGCTCTCAATTCTTAAACTCTTCTTGGG         |                                 |
| AD-PsUF3GT-F    | GCCATGGAGGCCAGTGAATTCATGGCTACAAATAGCATAG             |                                 |
| AD-PsUF3GT-R    | ATTCATCTGCAGCTCGAGCTCTTATTCCAGCATTTGTTTCATG          |                                 |
| AD-DFR-F        | GTACCAGATTACGCTCATATGATGCGACTTCTGGAACATGG            |                                 |
| AD-DFR-R        | ATTCATCTGCAGCTCGAGCTCTTAGATTGTGTCATTAACATGG          |                                 |
| AD-CHS-F        | GCCATGGAGGCCAGTGAATTCATGGCTTCAGTTGAAGAAATTAG         |                                 |
| AD-CHS-R        | ATTCATCTGCAGCTCGAGCTCTCACTCACTGATTGTAATTGCAGG        |                                 |
| AD-PsUGT-F      | GTACCAGATTACGCTCATATGATGGCGCACCACCACTTCCT            |                                 |
| AD-PsUGT-R      | CAGCTCGAGCTCGATGGATCCCTCACAAATCACAACCTTTCCC          |                                 |
| AD-Ps3AT-F      | GTACCAGATTACGCTCATATGATGTCTCTCGTCCACACAGT            |                                 |
| AD-Ps3AT-R      | CAGCTCGAGCTCGATGGATCCCTCAACCTACAACCTTTCAAACC         |                                 |
| GAL4-AD         | TACCACTACAATGGATG                                    |                                 |
| 3'AD            | AGATGGTGCACGATGCACAG                                 |                                 |
| GAL4-BD         | TCATCGGAAGAGAGTAG                                    |                                 |
| 3'BD            | TAAGAGTCACTTTAAATTTGTATAC                            |                                 |

The restriction sites are underlined.

**Table S8.** Primer information used for qRT-PCR

| Gene name | Forward (5' to 3')      | Reverse (5' to 3')      |
|-----------|-------------------------|-------------------------|
| PsCHS     | CAAAGGGTCACGAGTTCTA     | CACGCAAGTGTCATCA        |
| PsCHI     | CCCACCTGGTTCTTCTATT     | CAGCACAGCCTCGGAAAGTTGTT |
| PsF3H     | CAACGAAATCCCAATCAT      | TTGTCATCAGGCGGTAGA      |
| PsF3'H    | TGTTACGGCAGGGACT        | TTTCTTGTTGGGCTTGG       |
| PsDFR     | ATCGGTTTCATGGCTTGT      | AATGGGTATCCGCTTTT       |
| PsANS     | GAAGATTGCTGGGTATGG      | CTGAGTTGCTTGGCGTA       |
| PsUFGT    | CTGGAGGTATTGTAGGGC      | GTTCAAGTTTCCGACGAG      |
| PsGSTF3   | TGATGGTTTGCCTTCTGG      | TTATGATTGCCCTGGATT      |
| PsPP2A    | TGATTACTTGCCCCCTCACAGCC | CATAACAGGTCGCACATTGGTC  |
| AtActin   | CTCCTGAAGAGCACCCCTG     | CCCTCGTAGATTGGCACA      |
